# Supplementary material for: A Generalizable Brain-Computer Interface (BCI) Using Machine Learning for Feature Discovery
Source: PLOS journal article supplement (doi:10.1371/journal.pone.0131328), 2015-06-26
Supplement: S1 (10.1371/journal.pone.0131328.s001) [file journal.pone.0131328.s001]

## S1 Text - Cohen's Kappa Calculation

Cohen's kappa [1] value is given by

$$\kappa = \frac{p_a - p_e}{1 - p_e}, \quad (1)$$

where  $p_a$  is the accuracy and  $p_e$  is the probability of a chance detection for the given data set. For an  $M$  class problem with  $N$  trials

$$p_a = \frac{1}{N} \sum_{i=1}^M C_{i,i} \quad (2)$$

and

$$p_e = \frac{1}{N^2} \sum_{i=1}^M C_{i,:} C_{:,i}, \quad (3)$$

where  $C$  is the  $N \times M$  confusion matrix and  $C_{i,:}$  and  $C_{:,i}$  represent the sum of elements in columns and rows of  $C$  (indexed by  $i$ ), respectively.  $p_e$  can be interpreted as normalizing the accuracy from the range  $[0 \ 1]$  to  $[p_{chance} \ 1]$ , where  $p_{chance}$  is the accuracy expected by random guess given a test subset (i.e.  $\frac{1}{M}$  in an  $M$ -class classifier). Therefore, Cohen's kappa takes values of  $[-1 \ 1]$ , where 0 represents the expected performance of a random guess, 1 represents perfect accuracy, and -1 represents perfect and consistent disagreement with the true values.

To test for significance, first the variance of  $\kappa$  is calculated as

$$var(\kappa) = \frac{p_e}{N(1 - p_e)} \quad (4)$$

From this, the standard z-score is calculated as

$$z = \frac{\kappa}{var(\kappa)} \quad (5)$$

from which a p-score is evaluated from the unit Gaussian distribution.

## References

1. Cohen J. Weighted kappa: Nominal scale agreement provision for scaled disagreement or partial credit. Psychological bulletin. 1968;70(4):213–220.
