# Supplementary material for: A Generalizable Brain-Computer Interface (BCI) Using Machine Learning for Feature Discovery
Source: PLOS journal article supplement (doi:10.1371/journal.pone.0131328), 2015-06-26
Supplement: S2 (10.1371/journal.pone.0131328.s002) [file journal.pone.0131328.s002]

## S1 Appendix - Confusion Matrices and Artificial Neural Network Sizes

### Average of Five-Fold Cross Validation Confusion Matrices

The results of the three-class classifier for each participant are presented as confusion matrices. Each is the average of the five-fold cross validation. The rows of the table represent the actual class and the columns show the predicted class as output by the ANN classifier. Results are presented as percentages and standard deviations. Values within the confusion matrix are the average percentage of entries within that cell. Percentages at the end of the rows and columns indicate the percentage of entries in that row/column that are correct classifications. The bottom right value is the overall accuracy (the sum of the diagonal entries).

**Table 1. Average results of five-fold cross validations for Participant A**

|             |            | Predicted   |             |             | Sensitivity        |
|-------------|------------|-------------|-------------|-------------|--------------------|
|             |            | No Squeeze  | Right       | Left        |                    |
| Actual      | No Squeeze | 35.5% ± 1.0 | 10.4% ± 1.8 | 13.1% ± 1.2 | 60.2% ± 1.4        |
|             | Right      | 8.1% ± 2.1  | 10.7% ± 1.9 | 2.4% ± 1.1  | 50.6% ± 6.2        |
|             | Left       | 5.9% ± 1.4  | 2.0% ± 0.7  | 12.0% ± 2.0 | 60.3% ± 8.2        |
| Specificity |            | 72.0% ± 4.5 | 46.4% ± 6.9 | 43.6% ± 6.1 | <b>58.2% ± 2.2</b> |

**Table 2. Average results of five-fold cross validations for Participant B**

|             |            | Predicted   |             |             | Sensitivity        |
|-------------|------------|-------------|-------------|-------------|--------------------|
|             |            | No Squeeze  | Right       | Left        |                    |
| Actual      | No Squeeze | 35.2% ± 1.8 | 8.4% ± 1.8  | 9.6% ± 1.5  | 66.2% ± 1.1        |
|             | Right      | 9.7% ± 3.4  | 11.0% ± 1.0 | 2.8% ± 1.9  | 48.4% ± 11.3       |
|             | Left       | 9.8% ± 2.5  | 2.6% ± 1.8  | 10.9% ± 0.7 | 47.0% ± 4.5        |
| Specificity |            | 64.4% ± 5.0 | 51.0% ± 7.3 | 47.0% ± 5.8 | <b>57.1% ± 2.9</b> |

**Table 3. Average results of five-fold cross validations for Participant C**

|             |            | Predicted   |             |             | Sensitivity        |
|-------------|------------|-------------|-------------|-------------|--------------------|
|             |            | No Squeeze  | Right       | Left        |                    |
| Actual      | No Squeeze | 24.8% ± 4.2 | 6.5% ± 1.6  | 5.4% ± 1.8  | 67.4% ± 4.7        |
|             | Right      | 13.2% ± 2.4 | 17.5% ± 3.9 | 1.3% ± 0.4  | 54.4% ± 8.9        |
|             | Left       | 14.8% ± 2.1 | 3.3% ± 1.0  | 13.4% ± 4.0 | 42.0% ± 8.2        |
| Specificity |            | 47.0% ± 3.7 | 63.6% ± 6.9 | 66.4% ± 6.8 | <b>55.6% ± 3.2</b> |

**Table 4. Average results of five-fold cross validations for Participant D**

|             |            | Predicted   |             |             | Sensitivity        |
|-------------|------------|-------------|-------------|-------------|--------------------|
|             |            | No Squeeze  | Right       | Left        |                    |
| Actual      | No Squeeze | 23.7% ± 2.7 | 8.4% ± 2.2  | 5.0% ± 1.4  | 63.7% ± 4.7        |
|             | Right      | 9.8% ± 2.7  | 19.1% ± 2.0 | 1.9% ± 0.6  | 62.0% ± 6.3        |
|             | Left       | 9.0% ± 1.6  | 1.9% ± 1.4  | 21.1% ± 3.3 | 65.8% ± 8.2        |
| Specificity |            | 55.8% ± 3.7 | 65.3% ± 8.5 | 75.1% ± 4.1 | <b>63.9% ± 4.3</b> |

**Table 5. Average results of five-fold cross validations for Participant E**

|             |            | Predicted   |             |             | Sensitivity        |
|-------------|------------|-------------|-------------|-------------|--------------------|
|             |            | No Squeeze  | Right       | Left        |                    |
| Actual      | No Squeeze | 38.9% ± 3.2 | 5.5% ± 1.4  | 7.4% ± 1.4  | 75.1% ± 3.1        |
|             | Right      | 6.6% ± 1.0  | 15.6% ± 2.0 | 2.8% ± 0.8  | 62.5% ± 6.1        |
|             | Left       | 6.1% ± 1.2  | 3.0% ± 0.9  | 14.1% ± 1.3 | 60.7% ± 4.0        |
| Specificity |            | 75.3% ± 2.5 | 64.9% ± 5.6 | 57.9% ± 3.8 | <b>68.6% ± 0.8</b> |

## ANN Hidden Layers - 2 class

**Table 6. Hidden Layer Configuration for Participant A’s ANN**

| Validation Fold | Hidden Layers |
|-----------------|---------------|
| One             | 80-213-20     |
| Two             | 281           |
| Three           | 191           |
| Four            | 6             |
| Five            | 101-493-207   |

**Table 7. Hidden Layer Configuration for Participant B’s ANN**

| Validation Fold | Hidden Layers |
|-----------------|---------------|
| One             | 96            |
| Two             | 154           |
| Three           | 101           |
| Four            | 493           |
| Five            | 104           |

**Table 8. Hidden Layer Configuration for Participant C’s ANN**

| Validation Fold | Hidden Layers |
|-----------------|---------------|
| One             | 287           |
| Two             | 366           |
| Three           | 122           |
| Four            | 295           |
| Five            | 375           |

**Table 9. Hidden Layer Configuration for Participant D's ANN**

| Validation Fold | Hidden Layers |
|-----------------|---------------|
| One             | 4-361         |
| Two             | 441-70        |
| Three           | 154-333-173   |
| Four            | 78-238-13     |
| Five            | 10            |

**Table 10. Hidden Layer Configuration for Participant E's ANN**

| Validation Fold | Hidden Layers |
|-----------------|---------------|
| One             | 59            |
| Two             | 31            |
| Three           | 280           |
| Four            | 237           |
| Five            | 361           |

### ANN Hidden Layers - 3 class

**Table 11. Hidden Layer Configuration for Participant A's ANN**

| Validation Fold | Hidden Layers |
|-----------------|---------------|
| One             | 34            |
| Two             | 69-144        |
| Three           | 114-287       |
| Four            | 464-17        |
| Five            | 453-81        |

**Table 12. Hidden Layer Configuration for Participant B's ANN**

| Validation Fold | Hidden Layers |
|-----------------|---------------|
| One             | 343-54        |
| Two             | 295-40        |
| Three           | 474           |
| Four            | 255           |
| Five            | 328           |

**Table 13. Hidden Layer Configuration for Participant C's ANN**

| Validation Fold | Hidden Layers |
|-----------------|---------------|
| One             | 477-290-15    |
| Two             | 71-157-18     |
| Three           | 197-3         |
| Four            | 423-54-257    |
| Five            | 324-29        |

**Table 14. Hidden Layer Configuration for Participant D's ANN**

| Validation Fold | Hidden Layers |
|-----------------|---------------|
| One             | 115-261-21    |
| Two             | 440           |
| Three           | 105-171       |
| Four            | 79-290        |
| Five            | 250-28-192    |

**Table 15. Hidden Layer Configuration for Participant E's ANN**

| Validation Fold | Hidden Layers |
|-----------------|---------------|
| One             | 147           |
| Two             | 94-479        |
| Three           | 411           |
| Four            | 308           |
| Five            | 205-307-205   |
